# Supplementary material
Source: publisher site journal article supplement (https://www.dovepress.com/article/347732)
Supplement: Supplementary file 1 [file get_supplementary_file.php]

**
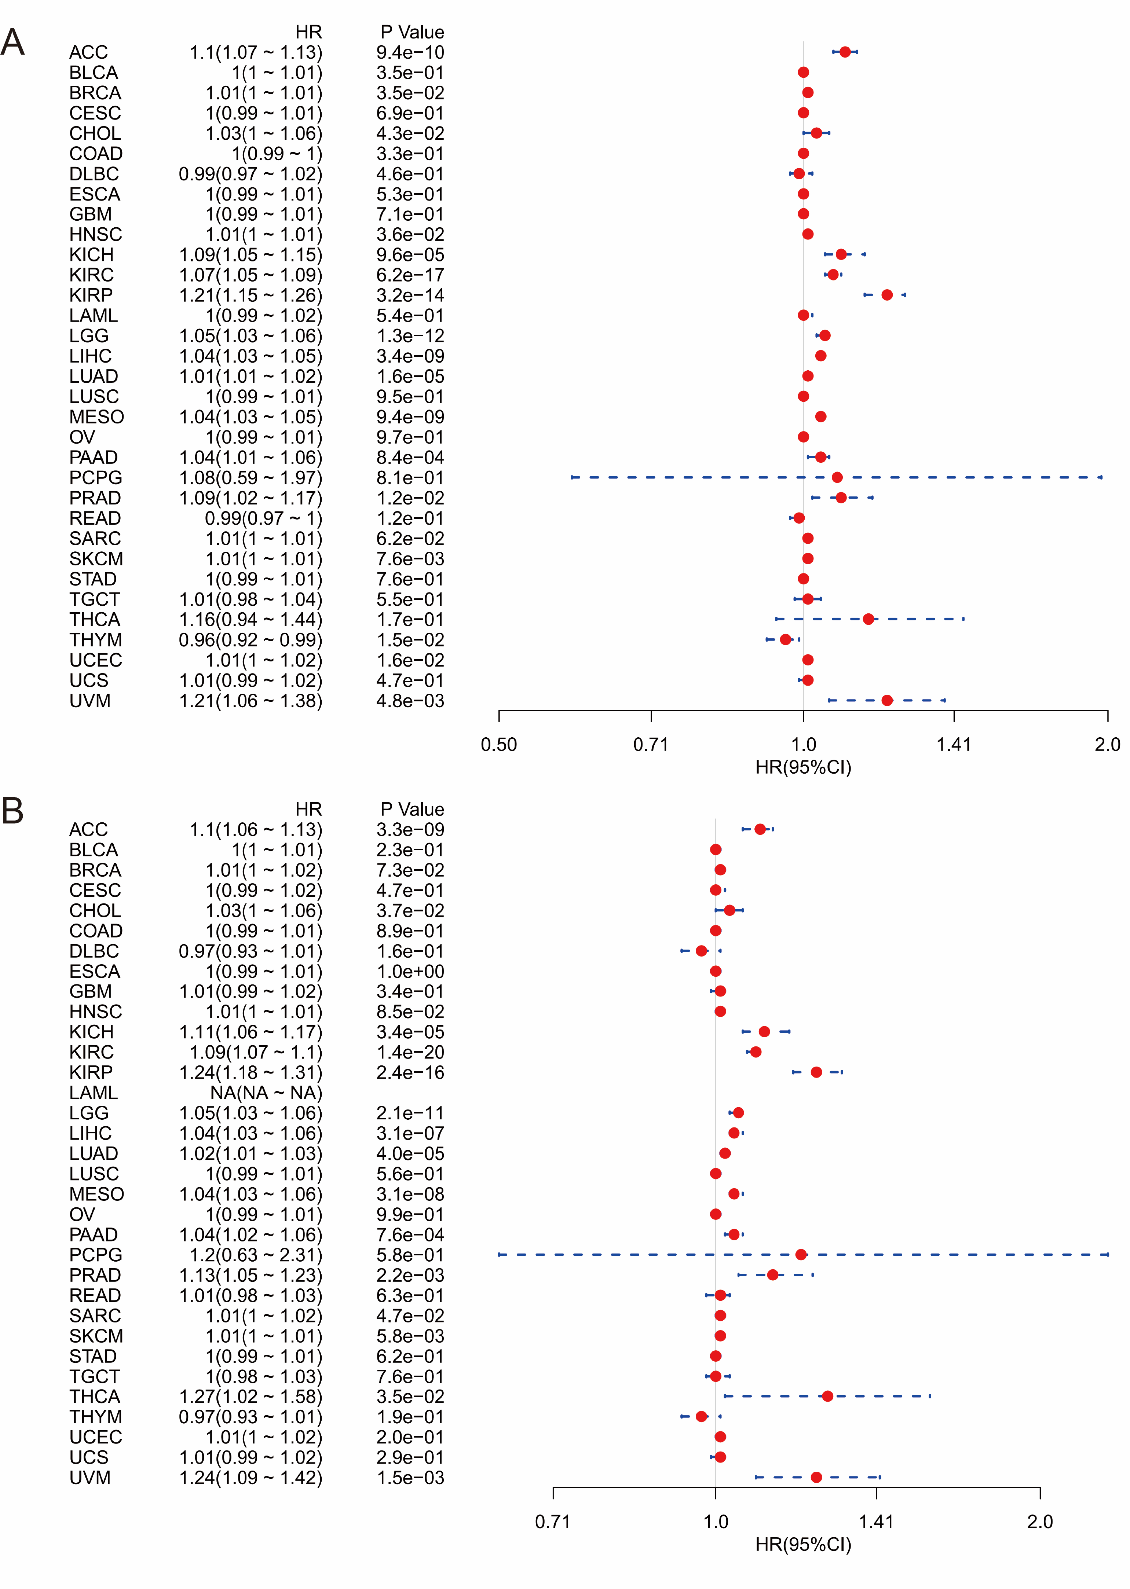
**

**Fig. S1** Prognostic value of PLK1 expression. **(A)** Univariate Cox regression analysis of OS in human pan-cancer. **(B)** Univariate Cox regression analysis of DSS in human pan-cancer.


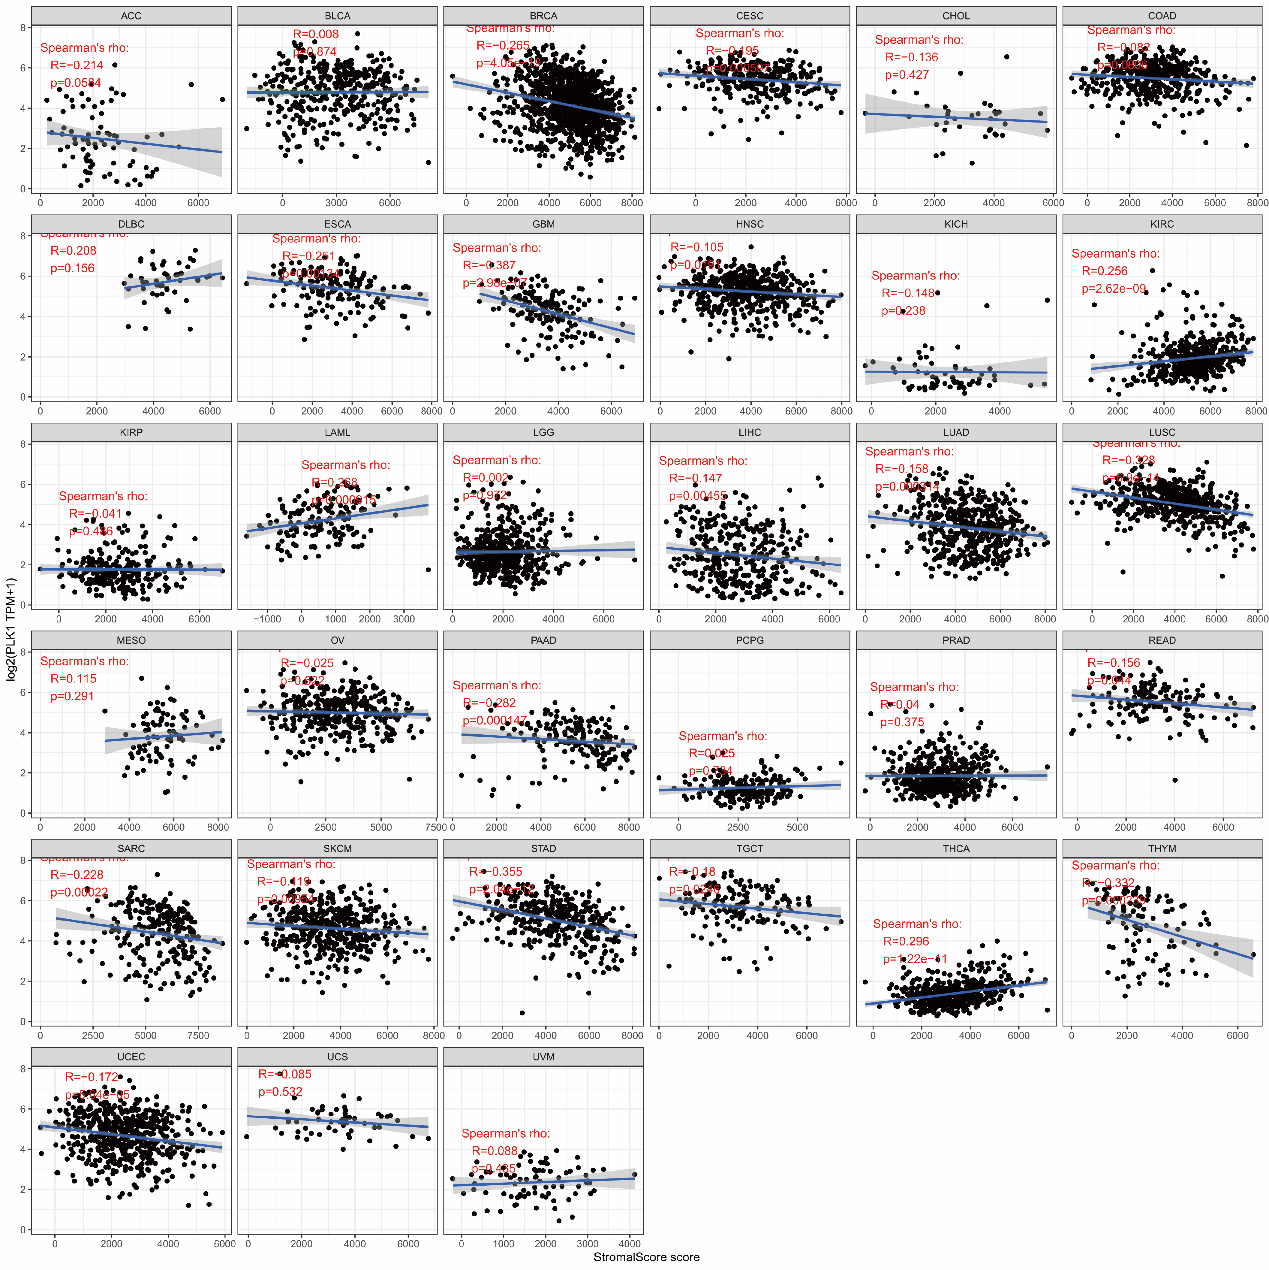


**Fig. S2** Correlation of PLK1 expression with StromalScore in pan-cancer.


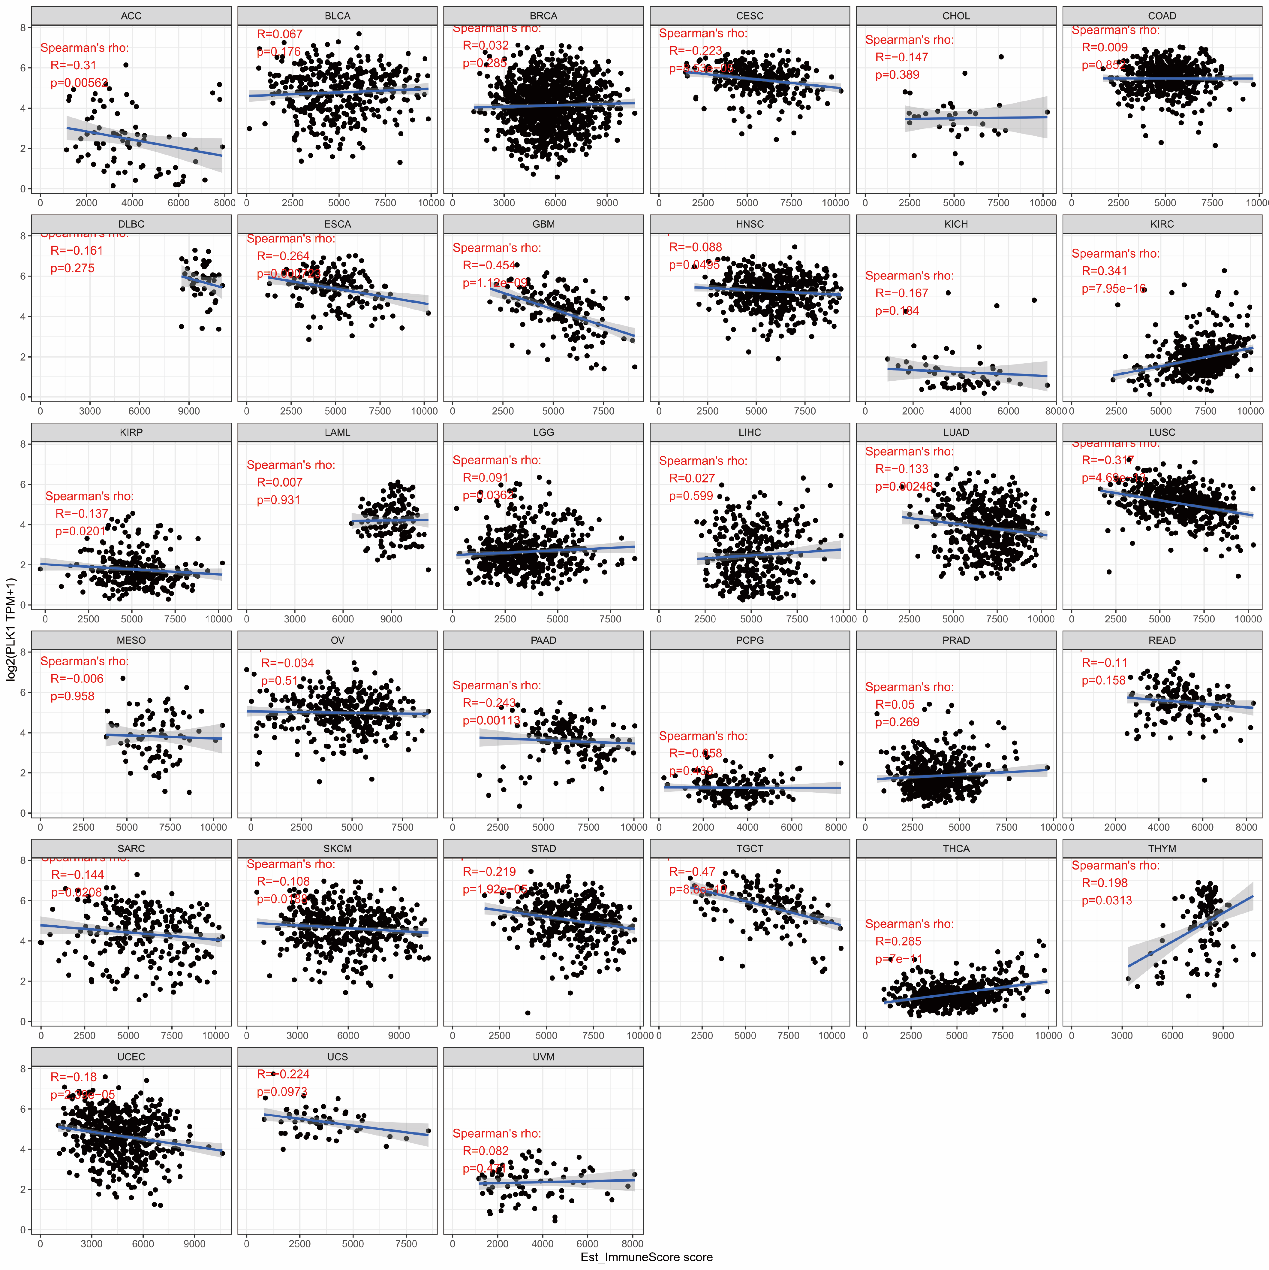


**Fig. S3** Correlation of PLK1 expression with ImmuneScore in pan-cancer.


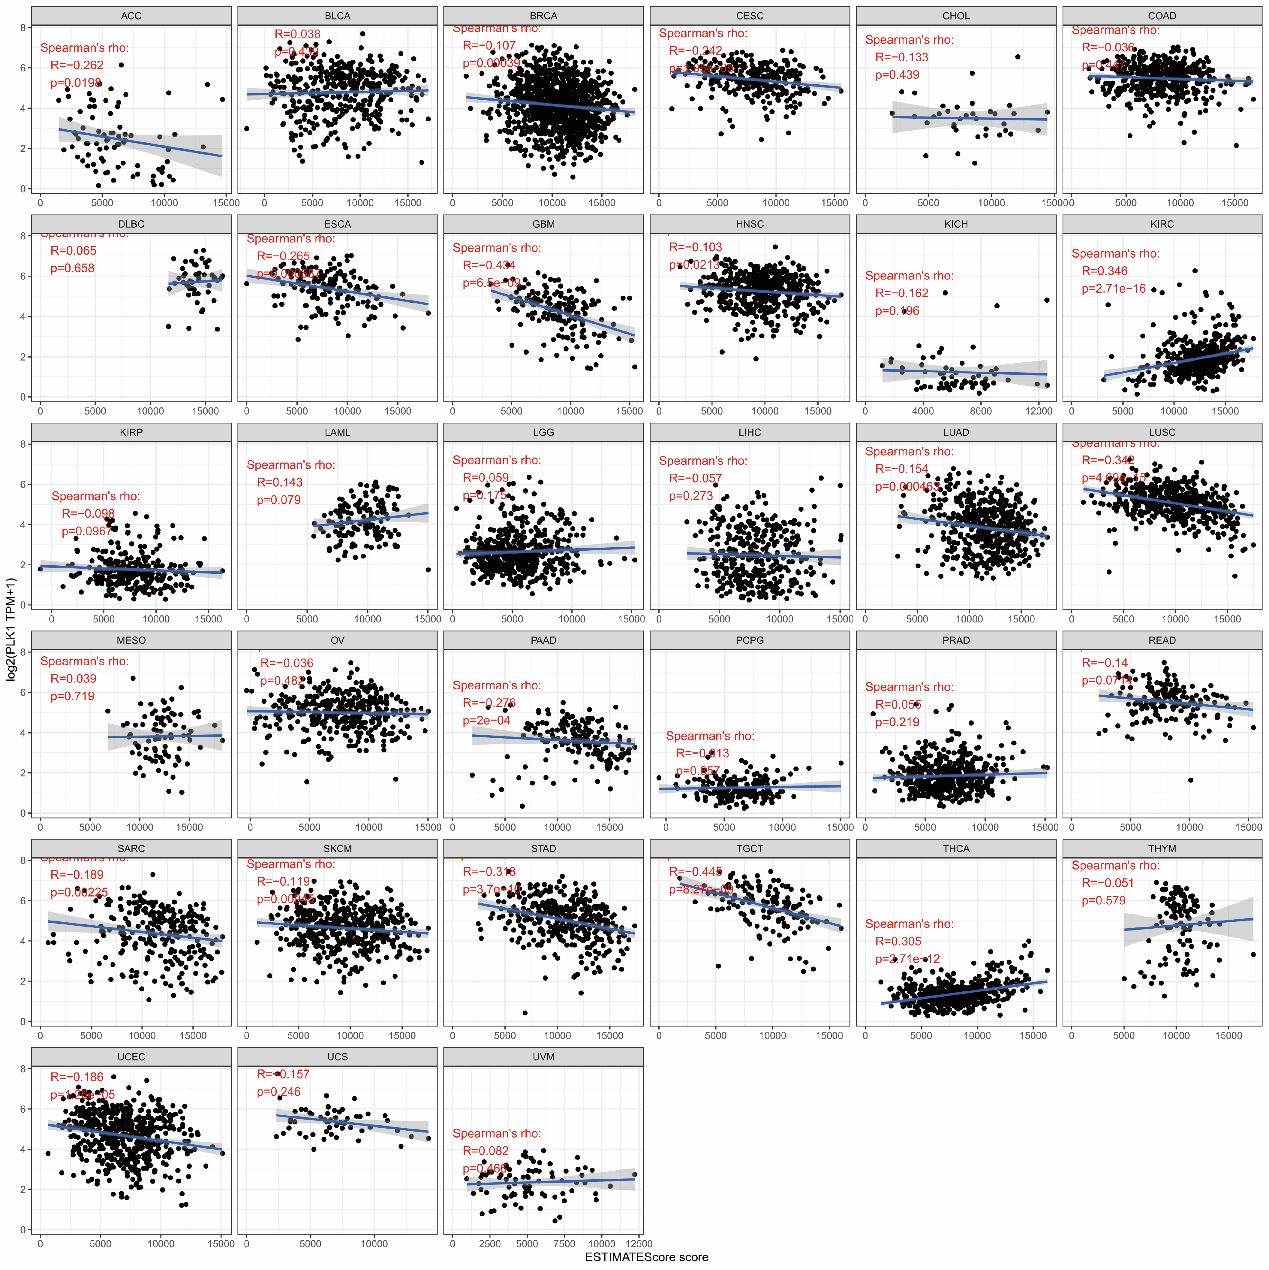


**Fig. S4** Correlation of PLK1 expression with ESTIMATEScore in pan-cancer.

Table S1. The correlation between PLK1 level and various clinicopathologic features

| Characteristics | Samples | PLK1 expression | | *P* value |
| --- | --- | --- | --- | --- |
|  |  | Low | High |  |
| Total | 32 | 16 | 16 |  |
| **Age** |  |  |  | 0.1351 |
| <60 | 11 | 8 | 3 |  |
| ≥60 | 21 | 8 | 13 |  |
| **Gende** |  |  |  | >0.9999 |
| Male | 21 | 11 | 10 |  |
| Female | 11 | 5 | 6 |  |
| **Metastasis** |  |  |  | 0.4839 |
| No | 30 | 16 | 14 |  |
| Yes | 2 | 0 | 2 |  |
| **WHO/ISUP** |  |  |  | 0.0177* |
| Ⅰ+Ⅱ | 26 | 16 | 10 |  |
| Ⅲ+Ⅳ | 6 | 0 | 6 |  |
| * Statistically significant. | |  |  |  |

Table S2. Expression levels of PLK1 in HCL dataset

| Tissue types | Expression levels of PLK1 |
| --- | --- |
| Preimplantation.Embryo | 6.4886 |
| ES.to.EB_8Day_Han | 1.7441 |
| Fetal.Gonad_Li | 1.7083 |
| Liver_Camp | 1.4025 |
| Testis_Guo | 1.1569 |
| Haematopoietic.Stem.Cell_Velten | 1.1482 |
| Fetal.Mid.Brain_LaManno | 0.96261 |
| Fetal.Liver | 0.89871 |
| Spermatogonial.Stem.Cell_Guo | 0.838 |
| ES.to.Hematopoietic.Cell | 0.67781 |
| iPS.to.EB_18Day | 0.56386 |
| Embryonic.Stem.Cell | 0.5434 |
| iPS.to.EB_9Day | 0.51876 |
| iPS | 0.48547 |
| Adult.Bone.Marrow | 0.43848 |
| Placenta_VentoTormo | 0.40111 |
| Fetal.Lung | 0.26889 |
| Adult.Pancreas_Muraro | 0.26232 |
| Adult.Pancreas_Segerstolpe | 0.25229 |
| Fetal.Heart | 0.23749 |
| iPS.to.EB_20Day | 0.23726 |
| Fetal.Thymus | 0.23257 |
| Adult.Spleen | 0.22562 |
| Airway.Epithelium_Plasschaert | 0.20684 |
| Fetal.Brain | 0.2007 |
| Fetal.Adrenal.Gland | 0.18761 |
| Fetal.Muscle | 0.18458 |
| Fetal.Male.Gonad | 0.16848 |
| Fetal.Skin | 0.15424 |
| Fetal.Pancreas | 0.14721 |
| Chorionic.Villus | 0.1398 |
| Fetal.Kidney | 0.11816 |
| Fetal.Spinal.Cord | 0.11681 |
| Fetal.Female.Gonad | 0.11678 |
| Fetal.Stomach | 0.10877 |
| Fetal.Intestine | 0.10526 |
| Placenta_Tsang | 0.09496 |
| Fetal.Eyes | 0.087425 |
| PSC.to.Pancreatic.Islet.Cell | 0.067025 |
| Fetal.Calvaria | 0.060225 |
| Adult.Stomach | 0.053345 |
| Adult.Brain | 0.052662 |
| Adult.Adipose | 0.052089 |
| Adult.Large.Intestine | 0.051496 |
| Dendritic.Cell.Monocyte_Villani | 0.050224 |
| Adult.Pancreas_Baron | 0.049494 |
| Fetal.Rib | 0.048786 |
| Neonatal.Adrenal.Gland | 0.042137 |
| Adult.Muscle | 0.038824 |
| Adult.Lung | 0.037413 |
| Placenta | 0.037137 |
| Cord.Blood | 0.034858 |
| Adult.Small.Intestine | 0.032877 |
| Adult.Liver | 0.032691 |
| Adult.Bone.Marrow.CD34P | 0.030039 |
| Breast.Epithelium_Nguyen | 0.02082 |
| Adult.Esophagus | 0.017104 |
| Adult.Trachea | 0.015545 |
| Adult.Pleura | 0.015244 |
| Adult.Adrenal.Gland | 0.015038 |
| Adult.Peripheral.Blood | 0.013834 |
| Adult.Bone.Marrow.CD34N | 0.012811 |
| Adult.Kidney | 0.011563 |
| Adult.Artery | 0.010967 |
| Adult.Pancreas | 0.008929 |
| Adult.Gall.Bladder | 0.008325 |
| Adult.Cervix | 0.006553 |
| Adult.Thyroid | 0.004109 |
| Adult.Uterus | 0.003837 |
| Adult.Bladder | 0 |
| Adult.Fallopian.Tube | 0 |
| Adult.Heart | 0 |
| Adult.Omentum | 0 |
| Adult.Prostate | 0 |
| Adult.Ureter | 0 |
| Lympho.Myeloid.Progenitor_Paresh | 0 |

Table S3. The correlation of PLK1 expression with the immune infiltrates

| cancer | B cells | | CD4+ T cells | | CD8+ T cells | | dendritic cells | | macrophages | | neutrophils | |
| --- | --- | --- | --- | --- | --- | --- | --- | --- | --- | --- | --- | --- |
| R-value | *p*-value | R-value | *p*-value | R-value | *p*-value | R-value | *p*-value | R-value | *p*-value | R-value | *p*-value |
| ACC | 0.255 | 2.38E-02 | -0.09 | 4.28E-01 | -0.239 | 3.43E-02 | 0.175 | 1.23E-01 | -0.132 | 2.46E-01 | 0.021 | 8.57E-01 |
| BLCA | -0.041 | 4.06E-01 | 0.04 | 4.23E-01 | 0.339 | 2.21E-12 | 0.377 | 3.23E-15 | 0.063 | 2.05E-01 | 0.236 | 1.55E-06 |
| BRCA | 0.115 | 1.46E-04 | -0.019 | 5.36E-01 | -0.096 | 1.40E-03 | 0.054 | 7.18E-02 | -0.16 | 1.02E-07 | 0.055 | 6.72E-02 |
| CESC | -0.094 | 1.01E-01 | 0.013 | 8.22E-01 | -0.172 | 2.57E-03 | -0.067 | 2.42E-01 | -0.164 | 3.99E-03 | -0.018 | 7.48E-01 |
| CHOL | 0 | 9.99E-01 | -0.082 | 6.34E-01 | 0.036 | 8.36E-01 | 0.094 | 5.82E-01 | 0.018 | 9.18E-01 | -0.088 | 6.08E-01 |
| COAD | -0.049 | 2.99E-01 | -0.03 | 5.19E-01 | -0.164 | 4.17E-04 | -0.043 | 3.62E-01 | -0.089 | 5.58E-02 | 0.051 | 2.80E-01 |
| DLBC | 0.007 | 9.72E-01 | -0.292 | 1.32E-01 | -0.056 | 7.77E-01 | 0.051 | 7.95E-01 | 0.057 | 7.75E-01 | 0.001 | 9.97E-01 |
| ESCA | -0.011 | 8.92E-01 | -0.132 | 9.33E-02 | -0.156 | 4.75E-02 | -0.34 | 1.08E-05 | -0.125 | 1.13E-01 | -0.287 | 2.29E-04 |
| GBM | -0.156 | 5.65E-02 | -0.23 | 4.55E-03 | 0.091 | 2.68E-01 | -0.199 | 1.41E-02 | -0.307 | 1.29E-04 | -0.256 | 1.48E-03 |
| HNSC | -0.076 | 8.97E-02 | 0.109 | 1.47E-02 | -0.062 | 1.66E-01 | 0.055 | 2.20E-01 | -0.008 | 8.61E-01 | 0.13 | 3.79E-03 |
| KICH | -0.008 | 9.52E-01 | 0.085 | 4.99E-01 | -0.006 | 9.63E-01 | -0.003 | 9.81E-01 | 0.081 | 5.23E-01 | 0.034 | 7.87E-01 |
| KIRC | 0.298 | 2.53E-12 | 0.306 | 5.94-13 | 0.221 | 2.77E-07 | 0.42 | 4.25E-24 | 0.267 | 3.84E-10 | 0.342 | 5.47E-16 |
| KIRP | 0.04 | 4.99E-01 | 0.084 | 1.53E-01 | -0.097 | 1.01E-01 | 0.029 | 6.21E-01 | -0.267 | 4.34E-06 | 0.223 | 1.35E-04 |
| LGG | 0.139 | 1.39E-03 | 0.155 | 3.79E-04 | -0.09 | 3.92E-02 | 0.126 | 3.80E-03 | 0.122 | 5.25E-03 | 0.053 | 2.23E-01 |
| LIHC | 0.387 | 8.25E-15 | 0.283 | 3.16E-08 | 0.236 | 4.19E-06 | 0.364 | 5.30E-13 | 0.375 | 6.93E-14 | 0.291 | 1.15E-08 |
| LUAD | -0.22 | 5.30E-07 | -0.081 | 6.73E-02 | -0.032 | 4.73E-01 | -0.062 | 1.64E-01 | -0.075 | 9.02E-02 | 0.083 | 6.25E-02 |
| LUSC | -0.268 | 1.09E-09 | -0.216 | 1.08E-06 | -0.225 | 3.44E-07 | -0.252 | 1.16E-08 | -0.268 | 1.17E-09 | -0.273 | 5.50E-10 |
| MESO | 0.356 | 7.86E-04 | 0.242 | 2.61E-02 | 0.088 | 4.20E-01 | 0.407 | 1.25E-04 | 0.102 | 3.55E-01 | -0.359 | 8.04E-04 |
| OV | 0.019 | 7.20E-01 | 0.045 | 3.85E-01 | -0.078 | 1.32E-01 | 0.018 | 7.35E-01 | 0.101 | 5.11E-02 | 0.04 | 4.38E-01 |
| PAAD | 0.128 | 8.77E-02 | -0.142 | 5.95E-02 | -0.042 | 5.74E-01 | 0.073 | 3.02E-01 | -0.239 | 1.31E-03 | -0.017 | 8.20E-01 |
| PCPG | 0.114 | 1.26E-01 | 0.225 | 2.23E-03 | -0.043 | 5.62E-01 | 0.26 | 4.01E-04 | 0.187 | 1.14E-02 | 0.035 | 6.37E-01 |
| PRAD | 0.197 | 9.43E-06 | 0.098 | 2.84E-02 | 0.039 | 3.85E-01 | 0.11 | 1.47E-02 | 0.071 | 1.16E-01 | 0.122 | 6.59E-03 |
| READ | -0.078 | 3.14E-01 | -0.061 | 4.34E-01 | -0.216 | 5.19E-03 | -0.039 | 6.13E-01 | -0.228 | 3.01E-03 | -0.04 | 6.09E-01 |
| SARC | 0.069 | 2.70E-01 | -0.206 | 8.91E-04 | -0.05 | 4.28E-01 | 0.011 | 8.66E-01 | -0.153 | 1.44E-02 | -0.121 | 5.23E-02 |
| SKCM | 0.084 | 6.91E-02 | -0.073 | 1.13E-01 | -0.064 | 1.64E-01 | 0.035 | 4.45E-01 | -0.102 | 2.69E-02 | -0.014 | 7.58E-01 |
| STAD | -0.203 | 9.30E-05 | -0.308 | 1.84E-09 | -0.184 | 4.04E-04 | -0.233 | 7.02E-06 | -0.0376 | 1.01E-13 | -0.171 | 1.05E-03 |
| TGCT | -0.261 | 1.04E-03 | -0.57 | 0.00E+00 | -0.043 | 5.93E-01 | -0.224 | 4.99E-03 | -0.203 | 1.10E-02 | -0.479 | 3.65E-10 |
| THCA | 0.42 | 4.35E-23 | 0.278 | 2.49E-10 | 0.202 | 4.62E-06 | 0.467 | 0.00E+00 | 0.279 | 1.81E-10 | 0.438 | 0.00E+00 |
| THYM | 0.806 | 3.08E-28 | 0.697 | 1.79E-18 | 0.607 | 3.36E-13 | 0.808 | 0.00E+00 | 0.575 | 9.39E-12 | -0.244 | 7.87E-03 |
| UCEC | -0.067 | 1.19E-01 | -0.039 | 3.67E-01 | -0.088 | 3.93E-02 | -0.07 | 1.05E-01 | -0.203 | 1.85E-06 | 0.148 | 5.27E-04 |
| UCS | -0.0017 | 9.01E-01 | -0.216 | 1.10E-01 | -0.072 | 5.95E-01 | -0.096 | 4.82E-01 | -0.115 | 3.99E-01 | -0.331 | 1.31E-02 |
| UVM | -0.166 | 1.42E-01 | -0.195 | 8.35E-02 | 0.336 | 2.28E-03 | 0.168 | 1.37E-01 | -0.157 | 1.64E-01 | -0.265 | 1.79E-02 |

Table S4. Correlation analysis of PLK1 expression with ESTIMATE scores

|  | StromalScore | | ImmuneScore | | ESTIMATEScore | |
| --- | --- | --- | --- | --- | --- | --- |
| cancer | R-value | *p*-value | R-value | *p*-value | R-value | *p*-value |
| ACC | -0.214 | 5.84E-02 | -0.31 | 5.62E-03 | -0.262 | 1.98E-02 |
| BLCA | 0.008 | 8.74E-01 | 0.067 | 1.76E-01 | 0.038 | 4.39E-01 |
| BRCA | -0.265 | 4.05E-19 | 0.032 | 2.85E-01 | -0.107 | 3.90E-04 |
| CESC | -0.195 | 5.97E-04 | -0.223 | 8.53E-05 | -0.242 | 1.95E-05 |
| CHOL | -0.136 | 4.27E-01 | -0.147 | 3.89E-01 | -0.133 | 4.39E-01 |
| COAD | -0.082 | 8.06E-02 | 0.009 | 8.52E-01 | -0.036 | 4.47E-01 |
| DLBC | 0.208 | 1.56E-01 | -0.161 | 2.75E-01 | 0.065 | 6.58E-01 |
| ESCA | -0.251 | 1.34E-03 | -0.264 | 7.23E-04 | -0.265 | 6.87E-04 |
| GBM | -0.387 | 2.98E-07 | -0.454 | 1.12E-09 | -0.434 | 6.50E-09 |
| HNSC | -0.105 | 1.91E-01 | -0.088 | 4.95E-02 | -0.103 | 2.13E-02 |
| KICH | -0.148 | 2.38E-01 | -0.167 | 1.84E-01 | -0.162 | 1.96E-01 |
| KIRC | 0.256 | 2.62E-09 | 0.341 | 7.95E-16 | 0.346 | 2.71E-16 |
| KIRP | -0.041 | 4.86E-01 | -0.137 | 2.01E-02 | -0.098 | 9.67E-02 |
| LAML | 0.268 | 9.15E-04 | 0.007 | 9.31E-01 | 0.143 | 7.90E-02 |
| LGG | 0.002 | 9.72E-01 | 0.091 | 3.62E-02 | 0.059 | 1.75E-01 |
| LIHC | -0.147 | 4.55E-03 | 0.027 | 5.99E-01 | -0.057 | 2.73E-01 |
| LUAD | -0.158 | 3.14E-04 | -0.133 | 2.48E-03 | -0.154 | 4.63E-04 |
| LUSC | -0.328 | 6.90E-14 | -0.317 | 4.69E-13 | -0.342 | 4.69E-15 |
| MESO | 0.115 | 2.91E-01 | -0.006 | 9.58E-01 | 0.039 | 7.19E-01 |
| OV | -0.025 | 6.22E-01 | -0.034 | 5.10E-01 | -0.036 | 4.82E-01 |
| PAAD | -0.282 | 1.45E-04 | -0.243 | 1.13E-03 | -0.276 | 2.00E-04 |
| PCPG | 0.025 | 7.34E-01 | -0.058 | 4.39E-01 | -0.013 | 8.57E-01 |
| PRAD | 0.04 | 3.75E-01 | 0.05 | 2.69E-01 | 0.055 | 2.19E-01 |
| READ | -0.156 | 4.40E-02 | -0.11 | 1.58E-01 | -0.14 | 7.14E-02 |
| SARC | -0.228 | 2.20E-04 | -0.144 | 2.08E-02 | -0.189 | 2.25E-03 |
| SKCM | -0.119 | 9.54E-03 | -0.108 | 1.88E-02 | -0.119 | 9.45E-03 |
| STAD | -0.355 | 2.04E-12 | -0.219 | 1.92E-05 | -0.318 | 3.70E-10 |
| TGCT | -0.18 | 2.40E-02 | -0.47 | 8.80E-10 | -0.445 | 8.27E-09 |
| THCA | 0.296 | 1.22E-11 | 0.285 | 7.00E-11 | 0.305 | 2.71E-12 |
| THYM | -0.332 | 2.39E-04 | 0.198 | 3.13E-02 | -0.051 | 5.79E-01 |
| UCEC | -0.172 | 5.64E-05 | -0.18 | 2.39E-05 | -0.186 | 1.26E-05 |
| UCS | -0.085 | 5.32E-01 | -0.224 | 9.73E-02 | -0.157 | 2.46E-01 |
| UVM | 0.088 | 4.35E-01 | 0.082 | 4.71E-01 | 0.082 | 4.66E-01 |
